# Supplementary material
Source: PubMed Central journal article supplement (PMC3449366)
Supplement: 97320630008664S1.pdf [file 97320630008664S1.pdf]

## Supplementary material:

**Table 1:** Metabolic Enzymes involved in different metabolic Pathways of CA-MRSA

| Sr. No.                                                    | Accession No. | Pathways/ Putative Targets                                          | E-value   | % Identity |
|------------------------------------------------------------|---------------|---------------------------------------------------------------------|-----------|------------|
| <b>Glycolysis/ Gluconeogenesis</b>                         |               |                                                                     |           |            |
| 1.                                                         | MW2435        | Fructose-bisphosphatase [EC:3.1.3.11]                               | 0.59      | 29         |
| 2.                                                         | MW2049        | Fructose-bisphosphate aldolase (EC:4.1.2.13)                        | 0.15      | 26         |
| 3.                                                         | MW0737        | Phosphoglyceromutase (EC:5.4.2.1)                                   | 0.48      | 33         |
| 4.                                                         | MW1729        | Phosphoenolpyruvate carboxykinase (EC:4.1.1.49)                     | 2.7       | 29         |
| 5.                                                         | MW1312        | PTS system glucose-specific enzyme II A component                   | 5.9       | 35         |
| 6.                                                         | MW2244        | PTS system arbutin-like IIBC component                              | 0         | 0          |
| <b>TCA Cycle</b>                                           |               |                                                                     |           |            |
| 7.                                                         | MW1173        | 2-oxoglutarate ferredoxin oxidoreductase subunit beta               | 0.81      | 25         |
| 8.                                                         | MW1030        | Succinate dehydrogenase cytochrome b-558                            | 1.1       | 33         |
| 9.                                                         | MW1729        | Phosphoenolpyruvate carboxykinase (EC:4.1.1.49)                     | 2.7       | 29         |
| <b>Pentose phosphate pathway</b>                           |               |                                                                     |           |            |
| 10.                                                        | MW0844        | Glucose-6-phosphate isomerase (EC:5.3.1.9)                          | 5e-08     | 23         |
| 11.                                                        | MW1721        | Putative transaldolase (EC:2.2.1.2)                                 | 0.16      | 38         |
| 12.                                                        | MW0113        | Phosphopentomutase (EC:5.4.2.7)                                     | 2.9       | 45         |
| 13.                                                        | MW2049        | Fructose-bisphosphate aldolase                                      | 0.15      | 26         |
| 14.                                                        | MW2435        | Fructose-bisphosphatase                                             | 0.59      | 29         |
| <b>Pentose and glucuronate interconversions</b>            |               |                                                                     |           |            |
| 15.                                                        | MW2419        | UTP-glucose-1-phosphate uridylyltransferase                         | 1e-10     | 23         |
| <b>Fructose and mannose metabolism</b>                     |               |                                                                     |           |            |
| 16.                                                        | MW2435        | Fructose-bisphosphatase                                             | 0.59      | 29         |
| 17.                                                        | MW2085        | Mannitol-1-phosphate 5-dehydrogenase                                | 0.27      | 27         |
| 18.                                                        | MW2049        | Fructose-bisphosphate aldolase (EC:4.1.2.13)                        | 0.15      | 26         |
| 19.                                                        | MW0662        | Fructose specific permease                                          | No hits   | 0          |
| 20.                                                        | MW2082        | PTS system mannitol specific IIBC component                         | No hits   | 0          |
| <b>Galactose metabolism</b>                                |               |                                                                     |           |            |
| 21.                                                        | MW2419        | UTP-glucose-1-phosphate uridylyltransferase                         | 1e-10     | 23         |
| 22.                                                        | MW0223        | PTS galactitol-specific enzyme IIC component                        | No hits   | 0          |
| 23.                                                        | MW2119        | Tagatose-6-phosphate kinase                                         | 0.37      | 26         |
| 24.                                                        | MW2118        | Tagatose 1,6-diphosphate aldolase                                   | 2.7       | 25         |
| 25.                                                        | MW2116        | PTS system lactose-specific IIBC component                          | 0.48      | 24         |
| 26.                                                        | MW1965        | Sucrose-6-phosphate hydrolase                                       | 8.6       | 29         |
| <b>Ascorbate and aldarate metabolism</b>                   |               |                                                                     |           |            |
| 27.                                                        | MW0306        | PTS system ascorbate-specific transporter subunit IIC               | No hits   | 0          |
| <b>Fatty acid biosynthesis</b>                             |               |                                                                     |           |            |
| 28.                                                        | MW0865        | 3-oxoacyl-(acyl carrier protein) synthase III (EC:2.3.1.41)         | 0.81      | 30         |
| <b>Ubiquinone and other terpenoid-quinone biosynthesis</b> |               |                                                                     |           |            |
| 29.                                                        | MW0927        | Menaquinone biosynthesis protein                                    | 2e-04     | 24         |
| 30.                                                        | MW1734        | O-succinylbenzoic acid synthetase                                   | 4.1       | 30         |
| <b>Oxidative phosphorylation</b>                           |               |                                                                     |           |            |
| 31.                                                        | MW1030        | Succinate dehydrogenase cytochrome b-558                            | 1.1       | 33         |
| 32.                                                        | MW2033        | F0F1 ATP synthase subunit A                                         | 0.6       | 27         |
| 33.                                                        | MW1860        | Putative manganese-dependent inorganic pyrophosphatase (EC:3.6.1.1) | 0.19      | 28         |
| <b>Purine metabolism</b>                                   |               |                                                                     |           |            |
| 34.                                                        | MW0113        | Phosphopentomutase (EC:5.4.2.7)                                     | 2.9       | 45         |
| 35.                                                        | MW0952        | Phosphoribosylformylglycinamidine synthase II                       | 2.00E-017 | 23         |
| 36.                                                        | MW0948        | Phosphoribosylaminoimidazole carboxylase ATPase subunit             | 1.00E-004 | 22         |
| 37.                                                        | MW0110        | Purine nucleoside phosphorylase (EC:2.4.2.1)                        | 1.7       | 25         |
| 38.                                                        | MW2062        | Purine nucleoside phosphorylase (EC:2.4.2.1)                        | 0.028     | 23         |
| 39.                                                        | MW2537        | Anaerobic ribonucleoside triphosphate reductase (EC:1.17.4.2)       | 0.12      | 26         |
| 40.                                                        | MW2143        | DNA-directed RNA polymerase subunit alpha (EC:2.7.7.6)              | 0.007     | 22         |
| 41.                                                        | MW1646        | DNA polymerase III alpha subunit                                    | 3.2       | 30         |
| 42.                                                        | MW1147        | DNA polymerase III PolC                                             | 0.015     | 24         |
| 43.                                                        | MW0002        | DNA polymerase III subunit beta (EC:2.7.7.7)                        | 0.01      | 26         |
| 44.                                                        | MW1538        | DNA polymerase III subunit delta                                    | 1.2       | 46         |
| 45.                                                        | MW0439        | DNA polymerase III delta prime subunit                              | 0.024     | 25         |
| 46.                                                        | MW0887        | GTP pyrophosphokinase                                               | 4.2       | 30         |
| 47.                                                        | MW1051        | Carbamate kinase (EC:2.7.2.2)                                       | 0.12      | 39         |
| 48.                                                        | MW2553        | Carbamate kinase (EC:2.7.2.2)                                       | 0.061     | 25         |
| <b>Pyrimidine metabolism</b>                               |               |                                                                     |           |            |
| 49.                                                        | MW1088        | Orotate phosphoribosyltransferase                                   | 2.00E-012 | 22         |
| 50.                                                        | MW1141        | Uridylate kinase                                                    | 1.7       | 26         |
| 51.                                                        | MW2143        | DNA-directed RNA polymerase subunit alpha (EC:2.7.7.6)              | 0.007     | 22         |
| 52.                                                        | MW1646        | DNA polymerase III alpha subunit                                    | 3.2       | 30         |
| 53.                                                        | MW1147        | DNA polymerase III PolC                                             | 0.015     | 24         |
| 54.                                                        | MW0002        | DNA polymerase III subunit beta (EC:2.7.7.7)                        | 0.01      | 26         |
| 55.                                                        | MW1538        | DNA polymerase III subunit delta                                    | 1.2       | 46         |
| 56.                                                        | MW0439        | DNA polymerase III delta prime subunit                              | 0.024     | 25         |
| 57.                                                        | MW2537        | Anaerobic ribonucleoside triphosphate reductase (EC:1.17.4.2)       | 0.12      | 26         |
| 58.                                                        | MW0110        | Purine nucleoside phosphorylase (EC:2.4.2.1)                        | 1.7       | 25         |
| 59.                                                        | MW2062        | Purine nucleoside phosphorylase (EC:2.4.2.1)                        | 0.028     | 23         |
| 60.                                                        | MW0437        | Thymidylate kinase                                                  | 0.041     | 25         |
| <b>Alanine, aspartate and glutamate metabolism</b>         |               |                                                                     |           |            |

|      |        |                                                                                                   |           |    |
|------|--------|---------------------------------------------------------------------------------------------------|-----------|----|
| 61.  | MW0426 | Glutamate synthase large subunit                                                                  | 0.5       | 24 |
| 62.  | MW0427 | Glutamate synthase subunit beta (EC:1.4.1.13)                                                     | 3.00E-012 | 22 |
| 63.  |        | <b>Glycine, serine and threonine metabolism</b>                                                   |           |    |
| 64.  | MW1281 | Aspartate kinase                                                                                  | 3.7       | 25 |
| 65.  | MW1214 | Aspartate kinase (EC:2.7.2.4)                                                                     | 4.3       | 30 |
| 66.  | MW1215 | Homoserine dehydrogenase                                                                          | 6.5       | 23 |
| 67.  | MW1217 | Homoserine kinase                                                                                 | 2         | 26 |
| 68.  | MW0737 | Phosphoglyceromutase (EC:5.4.2.1)                                                                 | 0.48      | 33 |
| 69.  | MW1260 | Tryptophan synthase subunit alpha (EC:4.2.1.20)                                                   | 0.39      | 22 |
| 70.  | MW1259 | Tryptophan synthase subunit beta (EC:4.2.1.20)                                                    | 1.8       | 30 |
| 71.  | MW0332 | 5-methyltetrahydropteroyltriglutamate--homocysteine S-methyltransferase (EC:2.1.1.14)             | 1.2       | 44 |
| 72.  | MW1550 | 5'-methylthioadenosine nucleosidase/S-adenosylhomocysteine nucleosidase                           | 3.5       | 41 |
|      |        | <b>Valine, leucine and isoleucine biosynthesis</b>                                                |           |    |
| 73.  | MW1980 | Ketol-acid reductoisomerase (EC:1.1.1.86)                                                         | 0.039     | 35 |
| 74.  | MW1977 | Dihydroxy-acid dehydratase (EC:4.2.1.9)                                                           | 0.29      | 33 |
| 75.  | MW1981 | d-Alanine metabolism                                                                              | 0.005     | 23 |
|      |        | <b>Lysine biosynthesis</b>                                                                        |           |    |
| 76.  | MW1215 | Homoserine dehydrogenase                                                                          | 6.5       | 23 |
| 77.  | MW1281 | Aspartate kinase                                                                                  | 3.7       | 25 |
| 78.  | MW1214 | Aspartate kinase (EC:2.7.2.4)                                                                     | 4.3       | 30 |
| 79.  | MW1284 | Dihydrodipicolinate reductase                                                                     | 4.1       | 40 |
| 80.  | MW1943 | Succinyl-diaminopimelate desuccinylase                                                            | 4.00E-008 | 23 |
| 81.  | MW1288 | Diaminopimelate decarboxylase                                                                     | 1.00E-018 | 23 |
| 82.  | MW1285 | Tetrahydrodipicolinate acetyltransferase                                                          | 6.7       | 34 |
| 83.  | MW2005 | UDP-N-acetylmuramoyl-L-alanyl-D-glutamyl-2,6-diaminopimelate-D-alanyl-D-alanyl ligase             | 1.4       | 59 |
|      |        | <b>Lysine degradation</b>                                                                         |           |    |
| 84.  | MW1693 | D-alanine aminotransferase                                                                        | 0.74      | 43 |
|      |        | <b>Beta-Lactam resistance</b>                                                                     |           |    |
| 85.  | MW2608 | Drp35                                                                                             | 2.00E-004 | 22 |
| 86.  | MW0032 | Truncated methicillin resistance protein MecR1                                                    | 0.55      | 23 |
| 87.  | MW0031 | Penicillin binding protein 2 prime                                                                | No hits   | 0  |
|      |        | <b>Arginine and proline metabolism</b>                                                            |           |    |
| 88.  | MW1693 | D-alanine aminotransferase                                                                        | 0.74      | 43 |
| 89.  | MW2556 | Arginine deiminase (EC:3.5.3.6)                                                                   | 2.7       | 34 |
| 90.  | MW1051 | Carbamate kinase (EC:2.7.2.2)                                                                     | 0.12      | 39 |
| 91.  | MW2553 | Carbamate kinase (EC:2.7.2.2)                                                                     | 0.061     | 25 |
| 92.  | MW0157 | Bifunctional ornithine acetyltransferase/N-acetylglutamate synthase protein (EC:2.3.1.35 2.3.1.1) | 1.9       | 25 |
| 93.  | MW0158 | N-acetyl-gamma-glutamyl-phosphate reductase (EC:1.2.1.38)                                         | 4.6       | 38 |
|      |        | <b>Histidine metabolism</b>                                                                       |           |    |
| 94.  | MW2598 | ATP phosphoribosyltransferase catalytic subunit (EC:2.4.2.17)                                     | 2.2       | 41 |
| 95.  | MW2591 | Bifunctional phosphoribosyl-AMP cyclohydrolase/phosphoribosyl-ATP pyrophosphatase protein         | 2.1       | 52 |
| 96.  | MW2593 | 1-(5-phosphoribosyl)-5-[(5-phosphoribosylamino)methylideneamino]imidazole-4-carboxamide isomerase | 4.3       | 34 |
| 97.  | MW2592 | Imidazole glycerol phosphate synthase subunit HisF                                                | 1.2       | 29 |
| 98.  | MW0686 | Histidinol-phosphate aminotransferase                                                             | 1.00E-005 | 21 |
| 99.  | MW2597 | Histidinol dehydrogenase                                                                          | 0.23      | 25 |
|      |        | <b>Tyrosine metabolism</b>                                                                        |           |    |
| 100. | MW0686 | Histidinol-phosphate aminotransferase                                                             | 1.00E-005 | 21 |
|      |        | <b>Phenylalanine metabolism</b>                                                                   |           |    |
| 101. | MW0686 | Histidinol-phosphate aminotransferase                                                             | 1.00E-005 | 21 |
| 102. | MW1693 | D-alanine aminotransferase                                                                        | 0.74      | 43 |
|      |        | <b>Phenylalanine, tyrosine and tryptophan biosynthesis</b>                                        |           |    |
| 103. | MW1680 | Bifunctional 3-deoxy-7-phosphoheptulonate synthase/chorismate mutase                              | 1.3       | 24 |
| 104. | MW1355 | 3-dehydroquinate synthase                                                                         | 0.75      | 42 |
| 105. | MW0782 | 3-dehydroquinate dehydratase                                                                      | 0.28      | 28 |
| 106. | MW1547 | Shikimate 5-dehydrogenase                                                                         | 0.038     | 23 |
| 107. | MW1354 | 3-phosphoshikimate 1-carboxyvinyltransferase (EC:2.5.1.19)                                        | 0.71      | 40 |
| 108. | MW1356 | Chorismate synthase (EC:4.2.3.5)                                                                  | 3.2       | 30 |
| 109. | MW1254 | Anthranilate synthase component I                                                                 | 1.6       | 22 |
| 110. | MW1256 | Anthranilate phosphoribosyltransferase                                                            | 0.96      | 25 |
| 111. | MW1258 | N-(5'-phosphoribosyl)anthranilate isomerase                                                       | No hits   | 0  |
| 112. | MW1257 | Indole-3-glycerol-phosphate synthase                                                              | 1         | 31 |
| 113. | MW1260 | Tryptophan synthase subunit alpha (EC:4.2.1.20)                                                   | 0.39      | 22 |
| 114. | MW1259 | Tryptophan synthase subunit beta (EC:4.2.1.20)                                                    | 1.8       | 30 |
| 115. | MW1252 | Prephenate dehydrogenase (EC:1.3.1.12)                                                            | 1.7       | 30 |
| 116. | MW0686 | Histidinol-phosphate aminotransferase                                                             | 1.00E-005 | 21 |
|      |        | <b>Novobiocin biosynthesis</b>                                                                    |           |    |
| 117. | MW1252 | Prephenate dehydrogenase (EC:1.3.1.12)                                                            | 1.7       | 30 |
| 118. | MW0686 | Histidinol-phosphate aminotransferase                                                             | 1.00E-005 | 21 |
|      |        | <b>Beta-Alanine metabolism</b>                                                                    |           |    |
| 119. | MW2517 | Pantoate--beta-alanine ligase (EC:6.3.2.1)                                                        | 1.6       | 33 |
|      |        | <b>Taurine and hypotaurine metabolism</b>                                                         |           |    |
| 120. | MW0543 | Phosphotransacetylase                                                                             | 0.85      | 29 |
| 121. | MW1654 | Acetate kinase (EC:2.7.2.1)                                                                       | 9.1       | 41 |
|      |        | <b>Selenocompound metabolism</b>                                                                  |           |    |
| 122. | MW0332 | 5-methyltetrahydropteroyltriglutamate--homocysteine S-methyltransferase (EC:2.1.1.14)             | 1.2       | 44 |
|      |        | <b>D-Glutamine and D-glutamate metabolism</b>                                                     |           |    |
| 123. | MW1033 | Glutamate racemase                                                                                | 0.091     | 24 |
| 124. | MW1066 | UDP-N-acetylmuramoyl-L-alanyl-D-glutamate synthetase (EC:6.3.2.9)                                 | 3.4       | 27 |
| 125. | MW1683 | UDP-N-acetylmuramate--L-alanine ligase (EC:6.3.2.8)                                               | 0.33      | 22 |
|      |        | <b>D-Arginine and D-ornithine metabolism</b>                                                      |           |    |

|      |        |                                                                                                              |           |    |
|------|--------|--------------------------------------------------------------------------------------------------------------|-----------|----|
| 126. | MW1693 | D-alanine aminotransferase                                                                                   | 0.74      | 43 |
|      |        | <b>D-Alanine metabolism</b>                                                                                  |           |    |
| 127. | MW1994 | Alanine racemase                                                                                             | 0.6       | 23 |
| 128. | MW2006 | D-alanyl-alanine synthetase A (EC:6.3.2.4)                                                                   | 0.023     | 23 |
| 129. | MW1693 | D-alanine aminotransferase                                                                                   | 0.74      | 43 |
|      |        | <b>Starch and sucrose metabolism</b>                                                                         |           |    |
| 130. | MW2299 | PTS system sucrose-specific IIBC component                                                                   | 1         | 29 |
| 131. | MW1965 | Sucrose-6-phosphate hydrolase                                                                                | 8.6       | 29 |
| 132. | MW0428 | PTS enzyme II                                                                                                | 0.62      | 38 |
| 133. | MW2419 | UTP-glucose-1-phosphate uridylyltransferase                                                                  | 1.00E-010 | 21 |
|      |        | <b>Amino sugar and nucleotide sugar metabolism</b>                                                           |           |    |
| 134. | MW0165 | N-acetylmuramic acid-6-phosphate etherase                                                                    | 3.00E-008 | 20 |
| 135. | MW1668 | PTS system N-acetylglucosamine-specific IIABC component                                                      | 0.5       | 22 |
| 136. | MW0454 | Bifunctional N-acetylglucosamine-1-phosphate uridylyltransferase / glucosamine-1-phosphate acetyltransferase | 6.00E-015 | 21 |
| 137. | MW0130 | Capsular polysaccharide synthesis enzyme Cap8G                                                               | 0.055     | 27 |
| 138. | MW0139 | Capsular polysaccharide synthesis enzyme Cap8P                                                               | 1.00E-007 | 21 |
| 139. | MW2035 | UDP-GlcNAc 2-epimerase                                                                                       | 2.00E-007 | 22 |
| 139. | MW0295 | N-acetylmannosamine-6-phosphate 2-epimerase (EC:5.1.3.9)                                                     | 2.5       | 30 |
| 140. | MW0138 | Capsular polysaccharide synthesis enzyme Cap8O                                                               | 4.00E-013 | 23 |
| 141. | MW2024 | UDP-N-acetylglucosamine 1-carboxyvinyltransferase (EC:2.5.1.7)                                               | 0.78      | 26 |
| 142. | MW2048 | UDP-N-acetylglucosamine 1-carboxyvinyltransferase (EC:2.5.1.7)                                               | 0.32      | 25 |
| 143. | MW0700 | UDP-N-acetylenolpyruvoylglucosamine reductase                                                                | 1.5       | 24 |
| 144. | MW2459 | PTS system glucose-specific IIABC component                                                                  | 3.5       | 38 |
| 145. | MW0844 | Glucose-6-phosphate isomerase (EC:5.3.1.9)                                                                   | 5.00E-008 | 23 |
| 146. | MW2419 | UTP-glucose-1-phosphate uridylyltransferase                                                                  | 1.00E-010 | 23 |
|      |        | <b>Peptidoglycan biosynthesis</b>                                                                            |           |    |
| 147. | MW2024 | UDP-N-acetylglucosamine 1-carboxyvinyltransferase (EC:2.5.1.7)                                               | 0.78      | 26 |
| 148. | MW2048 | UDP-N-acetylglucosamine 1-carboxyvinyltransferase (EC:2.5.1.7)                                               | 0.32      | 25 |
| 149. | MW0700 | UDP-N-acetylenolpyruvoylglucosamine reductase                                                                | 1.5       | 24 |
| 150. | MW1683 | UDP-N-acetylmuramate--L-alanine ligase (EC:6.3.2.8)                                                          | 0.33      | 22 |
| 151. | MW1066 | UDP-N-acetylmuramoyl-L-alanyl-D-glutamate synthetase (EC:6.3.2.9)                                            | 3.4       | 27 |
| 152. | MW2006 | D-alanyl-alanine synthetase A (EC:6.3.2.4)                                                                   | 0.023     | 23 |
| 153. | MW2005 | UDP-N-acetylmuramoylalanyl-D-glutamyl-2,6-diaminopimelate-D-alanyl-D-alanyl ligase                           | 1.4       | 59 |
| 154. | MW0645 | Undecaprenyl pyrophosphate phosphatase (EC:3.6.1.27)                                                         | No hits   | 0  |
| 155. | MW1065 | Phospho-N-acetylmuramoyl-pentapeptide-transferase                                                            | 1.2       | 36 |
| 156. | MW1340 | PBP2                                                                                                         | 2.7       | 25 |
| 157. | MW0604 | Penicillin binding protein 4                                                                                 | 1.3       | 23 |
| 158. | MW0899 | UDP-N-acetylmuramoylalanyl-D-glutamate--L-lysine ligase                                                      | 5         | 28 |
| 159. | MW2180 | FmhB protein                                                                                                 | 0.1       | 29 |
| 160. | MW1261 | Factor essential for expression of methicillin resistance                                                    | 1.1       | 33 |
| 161. | MW1262 | FemB protein                                                                                                 | 0.17      | 23 |
| 162. | MW1672 | Transglycosylase                                                                                             | No hits   | 0  |
| 163. | MW1814 | Glycosyltransferase                                                                                          | 21        | 3  |
| 164. | MW1064 | Penicillin-binding protein 1                                                                                 | 2.5       | 21 |
| 165. | MW1504 | Penicillin-binding protein 3                                                                                 | 0.95      | 28 |
|      |        | <b>Glycerolipid metabolism</b>                                                                               |           |    |
| 166. | MW1112 | Putative glycerol-3-phosphate acyltransferase PlsX                                                           | 9.6       | 23 |
| 167. | MW0297 | Glycerol ester hydrolase                                                                                     | 3         | 23 |
| 168. | MW2590 | Triacylglycerol lipase precursor (EC:3.1.1.3)                                                                | 4.8       | 32 |
| 169. | MW0898 | Diacylglycerol glucosyltransferase                                                                           | 0.73      | 31 |
|      |        | <b>Inositol phosphate metabolism</b>                                                                         |           |    |
| 170. | MW1940 | Truncated beta-hemplysin                                                                                     | 0.03      | 25 |
|      |        | <b>Glycerophospholipid metabolism</b>                                                                        |           |    |
| 171. | MW1112 | Putative glycerol-3-phosphate acyltransferase PlsX                                                           | 9.6       | 23 |
| 172. | MW1940 | Truncated beta-hemplysin                                                                                     | 0.03      | 25 |
|      |        | <b>Pyruvate metabolism</b>                                                                                   |           |    |
| 173. | MW0201 | Formate acetyltransferase                                                                                    | 1.4       | 21 |
| 174. | MW1654 | Acetate kinase (EC:2.7.2.1)                                                                                  | 9.1       | 41 |
| 175. | MW0543 | Phosphotransacetylase                                                                                        | 0.85      | 29 |
| 176. | MW2286 | Malate:quinone oxidoreductase (EC:1.1.5.4)                                                                   | 0.6       | 31 |
| 177. | MW2526 | Malate:quinone oxidoreductase (EC:1.1.5.4)                                                                   | 0.25      | 21 |
| 178. | MW1729 | Phosphoenolpyruvate carboxykinase (EC:4.1.1.49)                                                              | 2.7       | 29 |
| 179. | MW1981 | 2-isopropylmalate synthase (EC:2.3.3.13)                                                                     | 0.005     | 23 |
|      |        | <b>Propanoate metabolism</b>                                                                                 |           |    |
| 180. | MW1654 | Acetate kinase (EC:2.7.2.1)                                                                                  | 9.1       | 41 |
| 181. | MW0543 | Phosphotransacetylase                                                                                        | 0.85      | 29 |
| 182. | MW0201 | Formate acetyltransferase                                                                                    | 1.4,      | 21 |
|      |        | <b>Butanoate metabolism</b>                                                                                  |           |    |
| 183. | MW1030 | Succinate dehydrogenase cytochrome b-558                                                                     | 1.1       | 33 |
| 184. | MW0201 | Formate acetyltransferase                                                                                    | 1.4       | 21 |
|      |        | <b>Methane metabolism</b>                                                                                    |           |    |
| 185. | MW2049 | Fructose-bisphosphate aldolase (EC:4.1.2.13)                                                                 | 0.15      | 26 |
| 186. | MW1654 | Acetate kinase (EC:2.7.2.1)                                                                                  | 9.1       | 41 |
| 187. | MW0543 | Phosphotransacetylase                                                                                        | 0.85      | 29 |
| 188. | MW0737 | Phosphoglyceromutase (EC:5.4.2.1)                                                                            | 0.48      | 33 |
|      |        | <b>Thiamine metabolism</b>                                                                                   |           |    |
| 189. | MW1658 | Thiamine biosynthesis protein ThiI                                                                           | 0.52      | 26 |
| 190. | MW2015 | Hydroxyethylthiazole kinase (EC:2.7.1.50)                                                                    | 1.2       | 31 |
| 191. | MW2014 | Thiamine-phosphate pyrophosphorylase                                                                         | 0.18      | 35 |
|      |        | <b>Riboflavin metabolism</b>                                                                                 |           |    |

|                                               |        |                                                                  |           |    |
|-----------------------------------------------|--------|------------------------------------------------------------------|-----------|----|
| 192.                                          | MW1709 | Riboflavin biosynthesis protein                                  | 2.8       | 27 |
| 193.                                          | MW1711 | Riboflavin specific deaminase                                    | 0.003     | 24 |
| 194.                                          | MW1710 | Riboflavin synthase subunit alpha (EC:2.5.1.9)                   | 0.21      | 30 |
| <b>Vitamin B6 metabolism</b>                  |        |                                                                  |           |    |
| 195.                                          | MW0535 | Phosphomethylpyrimidine kinase                                   | 0.037     | 25 |
| 196.                                          | MW0474 | Pyridoxal biosynthesis lyase PdxS                                | 0.58      | 37 |
| <b>Nicotinate and nicotinamide metabolism</b> |        |                                                                  |           |    |
| 197.                                          | MW0110 | Purine nucleoside phosphorylase (EC:2.4.2.1)                     | 1.7       | 25 |
| 198.                                          | MW2062 | Purine nucleoside phosphorylase (EC:2.4.2.1)                     | 0.028     | 23 |
| <b>Pantothenate and CoA biosynthesis</b>      |        |                                                                  |           |    |
| 199.                                          | MW1980 | Ketol-acid reductoisomerase (EC:1.1.1.86)                        | 0.039     | 35 |
| 200.                                          | MW1977 | Dihydroxy-acid dehydratase (EC:4.2.1.9)                          | 0.29      | 33 |
| 201.                                          | MW2518 | 3-methyl-2-oxobutanoate hydroxymethyltransferase (EC:2.1.2.11)   | 3.2       | 33 |
| 202.                                          | MW2367 | 2-dehydropantoate 2-reductase (EC:1.1.1.169)                     | 2.2       | 26 |
| 203.                                          | MW2519 | 2-dehydropantoate 2-reductase (EC:1.1.1.169)                     | 0.49      | 32 |
| 204.                                          | MW2517 | Pantoate-beta-alanine ligase (EC:6.3.2.1)                        | 1.6       | 33 |
| <b>Biotin metabolism</b>                      |        |                                                                  |           |    |
| 205.                                          | MW2346 | 6-carboxyhexanoate--CoA ligase (EC:6.2.1.14)                     | 0.75      | 26 |
| 206.                                          | MW2350 | Dethiobiotin synthetase                                          | 0.81      | 30 |
| <b>Folate biosynthesis</b>                    |        |                                                                  |           |    |
| 207.                                          | MW0469 | Dihydropteroate synthase                                         | 1.3       | 28 |
| <b>Porphyrin and chlorophyll metabolism</b>   |        |                                                                  |           |    |
| 208.                                          | MW1616 | Glutamyl-tRNA reductase                                          | 0.21      | 28 |
| 209.                                          | MW1613 | Uroporphyrinogen III synthase                                    | 0.34      | 26 |
| 210.                                          | MW2320 | Uroporphyrin-III C-methyl transferase                            | 1.2       | 26 |
| 211.                                          | MW2539 | Precorrin-2 dehydrogenase                                        | 1.7       | 28 |
| <b>Terpenoid backbone biosynthesis</b>        |        |                                                                  |           |    |
| 212.                                          | MW0450 | 4-diphosphocytidyl-2-C-methyl-D-erythritol kinase (EC:2.7.1.148) | 5.1       | 35 |
| 213.                                          | MW2466 | Hydroxymethylglutaryl-CoA reductase                              | 2.00E-005 | 21 |
| 214.                                          | MW0545 | Mevalonate kinase                                                | 3.00E-005 | 22 |
| 214.                                          | MW0547 | Phosphomevalonate kinase                                         | 7.3       | 26 |
| <b>Nitrogen metabolism</b>                    |        |                                                                  |           |    |
| 215.                                          | MW1051 | Carbamate kinase (EC:2.7.2.2)                                    | 0.12      | 39 |
| 216.                                          | MW2553 | Carbamate kinase (EC:2.7.2.2)                                    | 0.061     | 25 |
| 217.                                          | MW2319 | Respiratory nitrate reductase alpha chain                        | 3.3       | 43 |
| 218.                                          | MW2318 | Nitrate reductase beta chain NarH                                | 1.7       | 31 |
| 219.                                          | MW2316 | Nitrate reductase gamma chain                                    | 0.68      | 29 |
| 220.                                          | MW0426 | Glutamate synthase large subunit                                 | 0.5       | 24 |

**Table 2:** List of Essential Genes for CA-MRSA

| Sr. No. | Gene ID | Gene Name   | DEG ID      | TARGET                                                      | PATHWAYS                                                                                                           |
|---------|---------|-------------|-------------|-------------------------------------------------------------|--------------------------------------------------------------------------------------------------------------------|
| 1.      | MW2049  | <b>fbaA</b> | DEG10020239 | <b>Fructose-bisphosphate aldolase</b> (EC:4.1.2.13)         | Glycolysis / Gluconeogenesis<br>Pentose phosphate pathway<br>Fructose and mannose metabolism<br>Methane metabolism |
| 2.      | MW0737  | <b>pgm</b>  | DEG10020010 | <b>Phosphoglyceromutase</b> (EC:5.4.2.1)                    | Glycolysis / Gluconeogenesis<br>Glycine, serine and threonine metabolism<br>Methane metabolism                     |
| 3.      | MW2244  | <b>glvC</b> | DEG10020290 | PTS system arbutin-like IIBC component                      | Glycolysis / Gluconeogenesis                                                                                       |
| 4.      | MW1030  | <b>sdhC</b> | DEG10150209 | Succinate dehydrogenase cytochrome b-558                    | TCA cycle<br>Oxidative phosphorylation                                                                             |
| 5.      | MW0844  | <b>pgi</b>  | DEG10020081 | Glucose-6-phosphate isomerase (EC:5.3.1.9)                  | Butanoate metabolism<br>Pentose phosphate pathway<br>Amino sugar and nucleotide sugar metabolism                   |
| 6.      | MW0113  | <b>drm</b>  | DEG10020010 | Phosphopentomutase (EC:5.4.2.7)                             | Pentose phosphate pathway<br>Purine metabolism                                                                     |
| 7.      | MW2085  | <b>mtlD</b> | DEG10020244 | Mannitol-1-phosphate 5-dehydrogenase                        | Fructose and mannose metabolism                                                                                    |
| 8.      | MW0662  | <b>fruA</b> | DEG10020060 | Fructose specific permease                                  | Fructose and mannose metabolism                                                                                    |
| 9.      | MW0223  | <b>gatC</b> | DEG10170276 | PTS galactitol-specific enzyme IIC component                | Galactose metabolism                                                                                               |
| 10.     | MW0865  | <b>fabH</b> | DEG10210185 | 3-oxoacyl-(acyl carrier protein) synthase III (EC:2.3.1.41) | Fatty acid biosynthesis                                                                                            |
| 11.     | MW0952  | <b>purL</b> | DEG10100130 | Phosphoribosylformylglycinamide synthase II                 | Purine metabolism                                                                                                  |
| 12.     | MW0110  | <b>pnp</b>  | DEG10020139 | <b>Purine nucleoside phosphorylase</b> (EC:2.4.2.1)         | Purine metabolism<br>Pyrimidine metabolism<br>Nicotinate and nicotinamide metabolism                               |
| 13.     | MW2062  | <b>deoD</b> | DEG10060036 | Purine nucleoside phosphorylase (EC:2.4.2.1)                | Purine metabolism<br>Pyrimidine metabolism<br>Nicotinate and nicotinamide metabolism                               |

|     |        |              |             |                                                                                                          |                                                                                                          |
|-----|--------|--------------|-------------|----------------------------------------------------------------------------------------------------------|----------------------------------------------------------------------------------------------------------|
| 14. | MW2143 | <b>rpoA</b>  | DEG10020252 | DNA-directed RNA polymerase subunit alpha (EC:2.7.7.6)                                                   | Purine metabolism<br>Pyrimidine metabolism                                                               |
| 15. | MW1646 | <b>dnaE</b>  | DEG10020201 | DNA polymerase III alpha subunit                                                                         | Purine metabolism<br>Pyrimidine metabolism                                                               |
| 16. | MW1538 | <b>holA</b>  | DEG10170216 | DNA polymerase III subunit delta                                                                         | Purine metabolism<br>Pyrimidine metabolism                                                               |
| 17. | MW1141 | <b>pyrH</b>  | DEG10170157 | <b>Uridylate kinase</b> (EC:2.7.4.22)                                                                    | Pyrimidine metabolism                                                                                    |
| 18. | MW0437 | <b>tmk</b>   | DEG10020028 | Thymidylate kinase                                                                                       | Pyrimidine metabolism                                                                                    |
| 19. | MW1259 | <b>trpB</b>  | DEG10020152 | <b>Tryptophan synthase subunit beta</b> (EC:4.2.1.20)                                                    | Glycine, serine and threonine metabolism<br>Phenylalanine, tyrosine and tryptophan biosynthesis          |
| 20. | MW2005 | <b>murF</b>  | DEG10020229 | UDP-N-acetylmuramoylalanyl-D-glutamyl-2,6-diaminopime-late-D-alanyl-D-alanyl ligase                      | Lysine biosynthesis<br>Peptidoglycan biosynthesis                                                        |
| 21. | MW0543 | <b>eutD</b>  | DEG10020053 | Phosphotransacetylase                                                                                    | Taurine and hypotaurine metabolism<br>Pyruvate metabolism<br>Propanoate metabolism<br>Methane metabolism |
| 22. | MW1654 | <b>ackA</b>  | DEG10020202 | <b>Acetate kinase</b> (EC:2.7.2.1)                                                                       | Taurine and hypotaurine metabolism<br>Pyruvate metabolism<br>Propanoate metabolism<br>Methane metabolism |
| 23. | MW1033 | <b>murI</b>  | DEG10020105 | Glutamate racemase                                                                                       | D-Glutamine and D-glutamate metabolism                                                                   |
| 24. | MW1066 | <b>murD</b>  | DEG10020108 | UDP-N-acetylmuramoyl-L-alanyl-D-glutamate synthetase (EC:6.3.2.9)                                        | D-Glutamine and D-glutamate metabolism<br>Peptidoglycan biosynthesis                                     |
| 25. | MW1683 | <b>murC</b>  | DEG10020208 | UDP-N-acetylmuramate--L-alanine ligase (EC:6.3.2.8)                                                      | D-Glutamine and D-glutamate metabolism<br>Peptidoglycan biosynthesis                                     |
| 26. | MW2006 | <b>ddl</b>   | DEG10020230 | D-alanyl-alanine synthetase A (EC:6.3.2.4)                                                               | D-Alanine metabolism<br>Peptidoglycan biosynthesis                                                       |
| 27. | MW0454 | <b>glmU</b>  | DEG10170026 | Bifunctional N-acetylglucosamine-1-phosphate uridyltransferase/glucosamine-1-phosphate acetyltransferase | Amino sugar & nucleotide sugar metabolism                                                                |
| 28. | MW2024 | <b>murA</b>  | DEG10020231 | <b>UDP-N-acetylglucosamine 1-carboxyvinyltransferase</b> (EC:2.5.1.7)                                    | Amino sugar & nucleotide sugar metabolism<br>Peptidoglycan biosynthesis                                  |
| 29. | MW0700 | <b>murB</b>  | DEG10170067 | UDP-N-acetylenolpyruvoylglucosamine reductase                                                            | Amino sugar & nucleotide sugar metabolism<br>Peptidoglycan biosynthesis                                  |
| 30. | MW2459 | <b>ptsG</b>  | DEG10020290 | PTS system glucose-specific IIABC component                                                              | Amino sugar & nucleotide sugar metabolism                                                                |
| 31. | MW0645 | <b>uppP</b>  | DEG10020058 | Undecaprenyl pyrophosphate phosphatase (EC:3.6.1.27)                                                     | Peptidoglycan biosynthesis                                                                               |
| 32. | MW1065 | <b>mraY</b>  | DEG10020107 | Phospho-N-acetylmuramoyl-pentapeptide-transferase                                                        | Peptidoglycan biosynthesis                                                                               |
| 33. | MW1112 | <b>plsX</b>  | DEG10020118 | Putative glycerol-3-phosphate acyltransferase PlsX                                                       | Glycerolipid metabolism<br>Glycerophospholipid metabolism                                                |
| 34. | MW2590 | <b>lip</b>   | DEG10020080 | Triacylglycerol lipase precursor (EC:3.1.1.3)                                                            | Glycerolipid metabolism                                                                                  |
| 35. | MW0469 | <b>folP</b>  | DEG10070125 | Dihydropteroate synthase                                                                                 | Folate biosynthesis                                                                                      |
| 36. | MW2466 | <b>mvaA</b>  | DEG10210047 | Hydroxymethylglutaryl-CoA reductase                                                                      | Terpenoid backbone biosynthesis                                                                          |
| 37. | MW0545 | <b>mvaK1</b> | DEG10210043 | Mevalonate kinase                                                                                        | Terpenoid backbone biosynthesis                                                                          |
| 38. | MW0547 | <b>mvaK2</b> | DEG10210045 | Phosphomevalonate kinase                                                                                 | Terpenoid backbone biosynthesis                                                                          |
| 39. | MW2319 | <b>narG</b>  | DEG10020284 | Respiratory nitrate reductase alpha chain                                                                | Nitrogen metabolism                                                                                      |
